# Supplementary material for: Emergence of carbapenem-resistant Klebsiella pneumoniae harbouring bla OXA-48-like genes in China
Source: PubMed Central journal article supplement (PMC8346730; doi:10.1099/jmm.0.001306), 2021-01-28
Supplement: jmm-70-306-s001.pdf [file jmm-70-306-s001.pdf]

**Supplemental Table 1. The raw data presentation of whole-genome sequencing of clinical strains.**

| Strains | Coverage | N50<br>contigs | of GC<br>content<br>(%) | CDS<br>no. | Accession no.     |
|---------|----------|----------------|-------------------------|------------|-------------------|
| YML0508 | 270      | 377,036        | 57.30%                  | 5,298      | CP045193-CP045195 |
| WSD411  | 90       | 48,371         | 55.20%                  | 5,581      | CP045686          |
| WSD2016 | 129      | 183,232        | 55.10%                  | 6,890      | WIXS00000000      |
| WSD2080 | 180      | 266,572        | 53.00%                  | 6,123      | WIXT00000000      |
